# Supplementary material for: Speciation of 127 I and 129 I in atmospheric aerosols at Risø, Denmark: insight into sources of iodine isotopes and their species transformations
Source: Copernicus journal article supplement (doi:10.5194/acp-16-1971-2016), 2016-02-23
Supplement: Supplementary file 1 [file acp-16-1971-2016-supplement.pdf]

Supplement of Atmos. Chem. Phys., 16, 1971–1985, 2016  
<http://www.atmos-chem-phys.net/16/1971/2016/>  
doi:10.5194/acp-16-1971-2016-supplement  
© Author(s) 2016. CC Attribution 3.0 License.

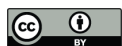

*Supplement of*

**Speciation of  $^{127}\text{I}$  and  $^{129}\text{I}$  in atmospheric aerosols at Risø, Denmark:  
insight into sources of iodine isotopes and their species transformations**

Luyuan Zhang et al.

*Correspondence to:* Xiaolin Hou (xiho@dtu.dk)

The copyright of individual parts of the supplement might differ from the CC-BY 3.0 licence.

1 **Supplementary material**

2 A 72 h (3 day) air mass back trajectory analysis for starting altitudes of 0 m above ground  
3 level (AGL) calculated from the FNL database of the National Ocean and Atmospheric  
4 Administration (NOAA) and simulated by using the Hybrid Single-Particle Lagrangian  
5 Integrated Trajectory (HY-SPLIT) model.

6 Figure S-1. Back trajectories from 4 April to 2 May 2011.

7 Figure S-2. Back trajectories from 8-15 December 2014.

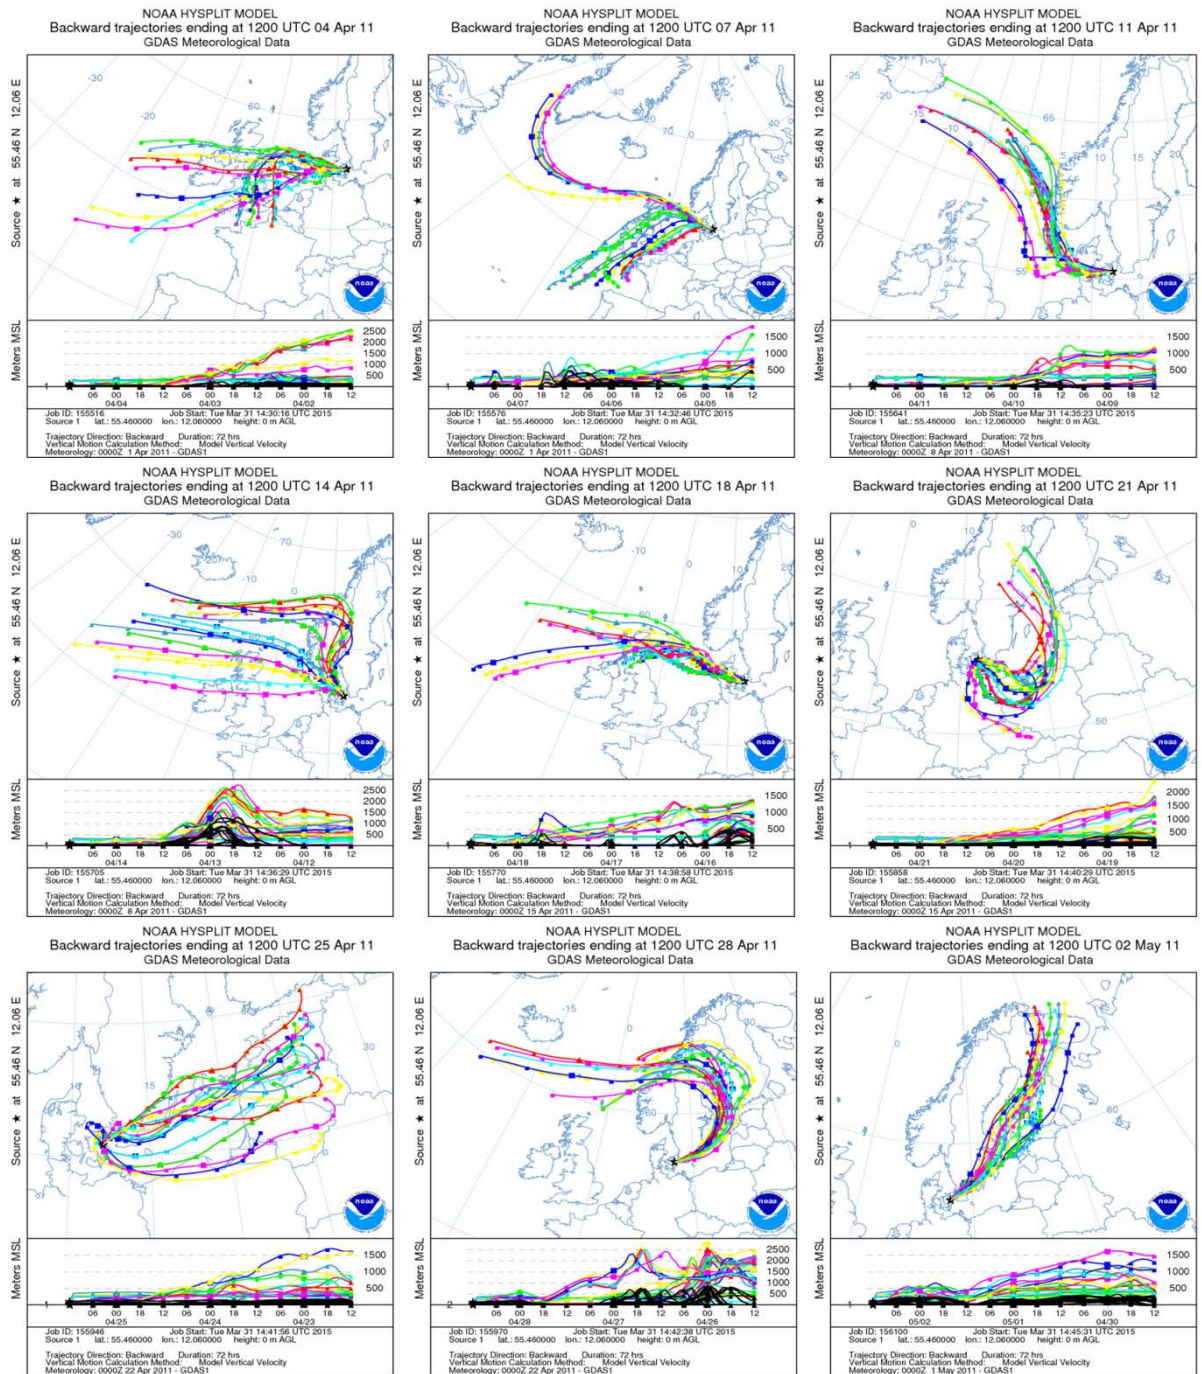

1  
2 Figure S-1. Back trajectories from 4 April to 2 May 2011.

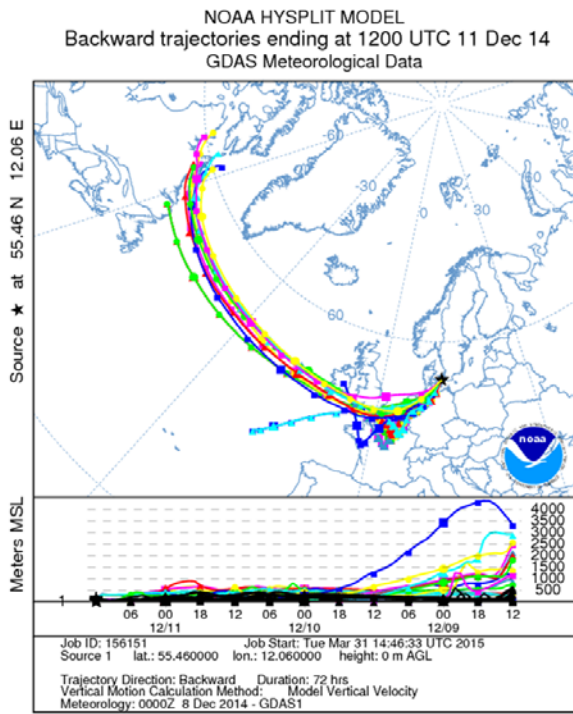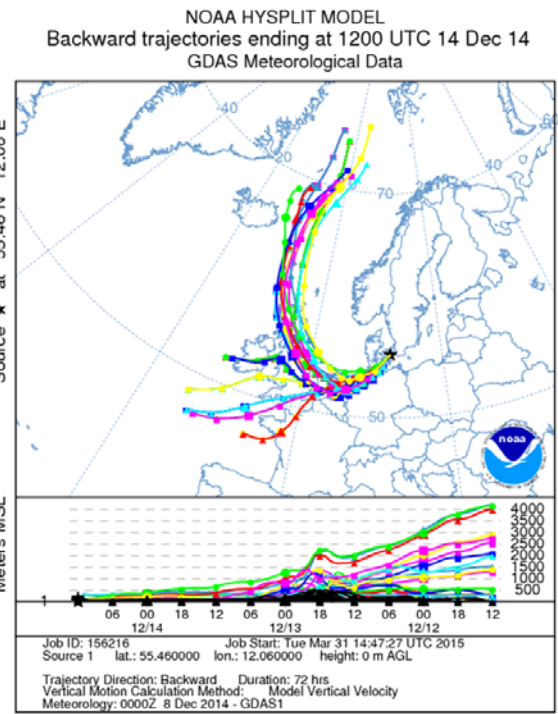

1

2 Figure S-2. Back trajectories from 8-15 December 2014.
